# Supplementary material for: Effect of Obstructive Sleep Apnea on the Risk of Injuries—A Nationwide Population-Based Cohort Study
Source: MDPI journal article supplement (doi:10.3390/ijerph182413416), 2021-12-20
Supplement: s1 [file s1]

**Supplementary Table S1.** The ICD-9-CM codes used in the study

|                                                          | ICD-9-CM codes                 |
|----------------------------------------------------------|--------------------------------|
| <b>Study cohort</b>                                      |                                |
| Obstructive sleep apnea                                  | 780.51, 780.53, 780.57;        |
| <b>Events: Injury</b>                                    | 800-999, E800-E999             |
| <i>Injury diagnosis</i>                                  |                                |
| Fracture                                                 | 800-829                        |
| Dislocation                                              | 830-839                        |
| Sprains and strains                                      | 840-849                        |
| Intracranial / internal injury                           | 850-869                        |
| Open wound                                               | 870-899                        |
| Injury to blood vessels                                  | 900-904                        |
| Superficial injury / contusion                           | 910-924                        |
| Crushing                                                 | 925-929                        |
| Foreign body entering through orifice                    | 930-939                        |
| Burn                                                     | 940-949                        |
| Injury to nerves and spinal cord                         | 950-957                        |
| Poisoning                                                | 960-989                        |
| Others injury                                            | 800-999 excluding listed above |
| <i>Cause of injury</i>                                   |                                |
| Unintentional                                            | E800-E949                      |
| Traffic                                                  | E800-E848                      |
| Poisoning (drugs / medicaments / biologicals)            | E850-E858                      |
| Poisoning (solid and liquid substances / gases / vapors) | E860-E869                      |
| Surgical / medical care                                  | E870-E876                      |
| Abnormal reaction of medical procedures                  | E878-E879                      |
| Falls                                                    | E880-E888                      |
| Burns and fires                                          | E890-E899                      |
| Environment                                              | E900-E909                      |
| Drowning                                                 | E910                           |
| Suffocation                                              | E911-E915                      |
| Other unintentional injuries                             | E916-E928                      |
| Late effects                                             | E929                           |
| Adverse drug reaction                                    | E930-E949                      |
| Intentional                                              | E950-E969                      |
| Suicide                                                  | E950-E959                      |
| Homicide / Abuse                                         | E960-E969                      |
| <b>Comorbidities</b>                                     |                                |
| Diabetes mellitus                                        | 250                            |
| Hypertension                                             | 401-405                        |
| Hyperlipidemia                                           | 278                            |

|                         |                           |
|-------------------------|---------------------------|
| Cerebrovascular disease | 410-414                   |
| Stroke                  | 430-438                   |
| Obesity                 | 278                       |
| Anxiety                 | 300.0, 300.2-300.3, 300.9 |
| Depression              | 296.2-296.3, 300.4, 311   |

**Supplementary Table S2.** Baseline characteristics of cohort and comparison cohort in the baseline

| OSA Variables         | Total         |       | With          |       | Without       |       | P     |
|-----------------------|---------------|-------|---------------|-------|---------------|-------|-------|
|                       | n             | %     | n             | %     | n             | %     |       |
| <b>Total</b>          | 34,575        |       | 6,915         | 20.00 | 27,660        | 80.00 |       |
| <b>Gender</b>         |               |       |               |       |               |       | 0.999 |
| Male                  | 23,200        | 67.10 | 4,640         | 67.10 | 18,560        | 67.10 |       |
| Female                | 11,375        | 32.90 | 2,275         | 32.90 | 9,100         | 32.90 |       |
| <b>Age (y)</b>        | 56.13 ± 17.94 |       | 56.11 ± 17.53 |       | 56.14 ± 18.04 |       | 0.901 |
| <b>Age group (y)</b>  |               |       |               |       |               |       | 0.999 |
| 20-44                 | 8,630         | 24.96 | 1,726         | 24.96 | 6,904         | 24.96 |       |
| 45-64                 | 12,180        | 35.23 | 2,436         | 35.23 | 9,744         | 35.23 |       |
| ≥ 65                  | 13,765        | 39.81 | 2,753         | 39.81 | 11,012        | 39.81 |       |
| <b>DM</b>             |               |       |               |       |               |       | 0.983 |
| Without               | 28,728        | 83.09 | 5,745         | 83.08 | 22,983        | 83.09 |       |
| With                  | 5,847         | 16.91 | 1,170         | 16.92 | 4,677         | 16.91 |       |
| <b>HTN</b>            |               |       |               |       |               |       | 0.947 |
| Without               | 31,492        | 91.08 | 6,297         | 91.06 | 25,195        | 91.09 |       |
| With                  | 3,083         | 8.92  | 618           | 8.94  | 2,465         | 8.91  |       |
| <b>Hyperlipidemia</b> |               |       |               |       |               |       | 0.946 |
| Without               | 34,233        | 99.01 | 6,846         | 99.00 | 27,387        | 99.01 |       |
| With                  | 342           | 0.99  | 69            | 1.00  | 273           | 0.99  |       |
| <b>CVD</b>            |               |       |               |       |               |       | 0.980 |
| Without               | 30,643        | 88.63 | 6,128         | 88.62 | 24,515        | 88.63 |       |
| With                  | 3,932         | 11.37 | 787           | 11.38 | 3,145         | 11.37 |       |
| <b>Stroke</b>         |               |       |               |       |               |       | 0.987 |
| Without               | 30,423        | 87.99 | 6,085         | 88.00 | 24,338        | 87.99 |       |
| With                  | 4,152         | 12.01 | 830           | 12.00 | 3,322         | 12.01 |       |
| <b>Obesity</b>        |               |       |               |       |               |       | 0.799 |
| Without               | 34,479        | 99.72 | 6,895         | 99.71 | 27,584        | 99.73 |       |
| With                  | 96            | 0.28  | 20            | 0.29  | 76            | 0.27  |       |
| <b>Anxiety</b>        |               |       |               |       |               |       | 0.899 |
| Without               | 34,186        | 98.87 | 6,836         | 98.86 | 27,350        | 98.88 |       |
| With                  | 389           | 1.13  | 79            | 1.14  | 310           | 1.12  |       |
| <b>Depression</b>     |               |       |               |       |               |       | 0.959 |
| Without               | 33,972        | 98.26 | 6,794         | 98.25 | 27,178        | 98.26 |       |

|      |     |      |     |      |     |      |
|------|-----|------|-----|------|-----|------|
| With | 603 | 1.74 | 121 | 1.75 | 482 | 1.74 |
|------|-----|------|-----|------|-----|------|

*P*: Chi-square / Fisher exact test on category variables and t-test on continue variables.

Abbreviations: OSA = obstructive sleep apnea; y = years; DM = diabetes mellitus; HTN = hypertension; CVD = cardiovascular disease.

**Table S3.** Years of follow-up

| OSAs    | Min  | Median | Max   | Mean $\pm$ SD     |
|---------|------|--------|-------|-------------------|
| With    | 0.01 | 5.64   | 15.88 | 10.29 $\pm$ 10.76 |
| Without | 0.01 | 6.97   | 15.98 | 10.94 $\pm$ 11.29 |
| Total   | 0.01 | 6.82   | 15.98 | 10.81 $\pm$ 10.83 |

**Table S4.** Years to injury

| OSAs    | Min  | Median | Max   | Mean $\pm$ SD   |
|---------|------|--------|-------|-----------------|
| With    | 0.01 | 4.46   | 15.54 | 5.54 $\pm$ 4.22 |
| Without | 0.01 | 4.80   | 15.79 | 5.63 $\pm$ 4.33 |
| Total   | 0.01 | 4.53   | 15.79 | 5.61 $\pm$ 4.31 |
